# Supplementary material
Source: publisher figshare collection journal article supplement (https://acs.figshare.com/ndownloader/files/4208443)
Supplement: Supplementary file 1 [file 4208443]

 
data_mo_20110623c_0m 
  
_audit_creation_method            SHELXL-97 
_chemical_name_systematic 
; 
 ? 
; 
_chemical_name_common             ? 
_chemical_melting_point           ? 
_chemical_formula_moiety          ? 
_chemical_formula_sum 
 'C23 H16 N2' 
_chemical_formula_weight          320.38 
  
loop_ 
 _atom_type_symbol 
 _atom_type_description 
 _atom_type_scat_dispersion_real 
 _atom_type_scat_dispersion_imag 
 _atom_type_scat_source 
 'C'  'C'   0.0033   0.0016 
 'International Tables Vol C Tables 4.2.6.8 and 6.1.1.4' 
 'H'  'H'   0.0000   0.0000 
 'International Tables Vol C Tables 4.2.6.8 and 6.1.1.4' 
 'N'  'N'   0.0061   0.0033 
 'International Tables Vol C Tables 4.2.6.8 and 6.1.1.4' 
  
_symmetry_cell_setting            Triclinic 
_symmetry_space_group_name_H-M    p-1 
  
loop_ 
 _symmetry_equiv_pos_as_xyz 
 'x, y, z' 
 '-x, -y, -z' 
  
_cell_length_a                    11.3832(6) 
_cell_length_b                    11.7346(6) 
_cell_length_c                    13.7133(7) 
_cell_angle_alpha                 84.2350(10) 
_cell_angle_beta                  73.9740(10) 
_cell_angle_gamma                 80.1920(10) 
_cell_volume                      1732.10(15) 
_cell_formula_units_Z             4 
_cell_measurement_temperature     296(2) 
_cell_measurement_reflns_used     6132 
_cell_measurement_theta_min       2.19 
_cell_measurement_theta_max       27.47 
  
_exptl_crystal_description        block 
_exptl_crystal_colour             colorless 
_exptl_crystal_size_max           0.28 
_exptl_crystal_size_mid           0.25 
_exptl_crystal_size_min           0.16 
_exptl_crystal_density_meas       ? 
_exptl_crystal_density_diffrn     1.229 
_exptl_crystal_density_method     'not measured' 
_exptl_crystal_F_000              672 
_exptl_absorpt_coefficient_mu     0.072 
_exptl_absorpt_correction_type    'Multi-scan' 
_exptl_absorpt_correction_T_min   0.980 
_exptl_absorpt_correction_T_max   0.989 
_exptl_absorpt_process_details    ? 
  
_exptl_special_details 
; 
 ? 
; 
  
_diffrn_ambient_temperature       296(2) 
_diffrn_radiation_wavelength      0.71073 
_diffrn_radiation_type            MoK\a 
_diffrn_radiation_source          'fine-focus sealed tube' 
_diffrn_radiation_monochromator   graphite 
_diffrn_measurement_device_type   'Bruker APEX-II CCD' 
_diffrn_measurement_method        '\f and \w scans' 
_diffrn_detector_area_resol_mean  ? 
_diffrn_reflns_number             18400 
_diffrn_reflns_av_R_equivalents   0.0274 
_diffrn_reflns_av_sigmaI/netI     0.0306 
_diffrn_reflns_limit_h_min        -5 
_diffrn_reflns_limit_h_max        13 
_diffrn_reflns_limit_k_min        -14 
_diffrn_reflns_limit_k_max        14 
_diffrn_reflns_limit_l_min        -16 
_diffrn_reflns_limit_l_max        16 
_diffrn_reflns_theta_min          1.55 
_diffrn_reflns_theta_max          25.20 
_reflns_number_total              6197 
_reflns_number_gt                 4583 
_reflns_threshold_expression      >2sigma(I) 
  
_computing_data_collection        'Bruker APEX2' 
_computing_cell_refinement        'Bruker SAINT' 
_computing_data_reduction         'Bruker SAINT' 
_computing_structure_solution     'SHELXS-97 (Sheldrick, 2008)' 
_computing_structure_refinement   'SHELXL-97 (Sheldrick, 2008)' 
_computing_molecular_graphics     'Bruker SHELXTL' 
_computing_publication_material   'Bruker SHELXTL' 
  
_refine_special_details 
; 
 Refinement of F^2^ against ALL reflections.  The weighted R-factor wR and 
 goodness of fit S are based on F^2^, conventional R-factors R are based 
 on F, with F set to zero for negative F^2^. The threshold expression of 
 F^2^ > 2sigma(F^2^) is used only for calculating R-factors(gt) etc. and is 
 not relevant to the choice of reflections for refinement.  R-factors based 
 on F^2^ are statistically about twice as large as those based on F, and R- 
 factors based on ALL data will be even larger. 
; 
  
_refine_ls_structure_factor_coef  Fsqd 
_refine_ls_matrix_type            full 
_refine_ls_weighting_scheme       calc 
_refine_ls_weighting_details 
 'calc w=1/[\s^2^(Fo^2^)+(0.1136P)^2^+0.1796P] where P=(Fo^2^+2Fc^2^)/3' 
_atom_sites_solution_primary      direct 
_atom_sites_solution_secondary    difmap 
_atom_sites_solution_hydrogens    geom 
_refine_ls_hydrogen_treatment     mixed 
_refine_ls_extinction_method      none 
_refine_ls_extinction_coef        ? 
_refine_ls_number_reflns          6197 
_refine_ls_number_parameters      459 
_refine_ls_number_restraints      0 
_refine_ls_R_factor_all           0.0649 
_refine_ls_R_factor_gt            0.0440 
_refine_ls_wR_factor_ref          0.1739 
_refine_ls_wR_factor_gt           0.1366 
_refine_ls_goodness_of_fit_ref    1.036 
_refine_ls_restrained_S_all       1.036 
_refine_ls_shift/su_max           0.001 
_refine_ls_shift/su_mean          0.000 
  
loop_ 
 _atom_site_label 
 _atom_site_type_symbol 
 _atom_site_fract_x 
 _atom_site_fract_y 
 _atom_site_fract_z 
 _atom_site_U_iso_or_equiv 
 _atom_site_adp_type 
 _atom_site_occupancy 
 _atom_site_symmetry_multiplicity 
 _atom_site_calc_flag 
 _atom_site_refinement_flags 
 _atom_site_disorder_assembly 
 _atom_site_disorder_group 
N2 N 1.03071(13) 0.31369(13) 0.17069(11) 0.0384(4) Uani 1 1 d . . . 
N4 N 0.59726(14) 0.27225(14) 0.99429(12) 0.0412(4) Uani 1 1 d . . . 
C7 C 0.98328(16) 0.32038(15) 0.09049(14) 0.0367(4) Uani 1 1 d . . . 
C5 C 1.03522(16) 0.35081(15) -0.01579(14) 0.0367(4) Uani 1 1 d . . . 
C30 C 0.49069(17) 0.32222(16) 1.05517(14) 0.0392(4) Uani 1 1 d . . . 
N3 N 0.28630(16) 0.34648(16) 1.13609(13) 0.0483(4) Uani 1 1 d . . . 
N1 N 0.84187(16) 0.30779(16) 0.00484(13) 0.0483(4) Uani 1 1 d . . . 
C33 C 0.36804(17) 0.21293(17) 0.99314(14) 0.0422(4) Uani 1 1 d . . . 
H33 H 0.2921 0.1934 0.9935 0.051 Uiso 1 1 calc R . . 
C32 C 0.47649(17) 0.16461(16) 0.92536(14) 0.0403(4) Uani 1 1 d . . . 
C8 C 0.95634(17) 0.28865(16) 0.26300(14) 0.0393(4) Uani 1 1 d . . . 
C11 C 0.86383(17) 0.29648(16) 0.09891(14) 0.0404(4) Uani 1 1 d . . . 
C4 C 1.14319(17) 0.39257(16) -0.07201(14) 0.0412(4) Uani 1 1 d . . . 
H4 H 1.2019 0.4046 -0.0400 0.049 Uiso 1 1 calc R . . 
C31 C 0.59036(17) 0.19329(16) 0.93189(14) 0.0398(4) Uani 1 1 d . . . 
C6 C 0.94511(17) 0.33956(16) -0.06537(14) 0.0408(4) Uani 1 1 d . . . 
C18 C 1.01312(18) 0.28407(17) 0.34986(14) 0.0435(5) Uani 1 1 d . . . 
C10 C 0.78775(18) 0.27023(17) 0.19325(15) 0.0457(5) Uani 1 1 d . . . 
H10 H 0.7083 0.2547 0.2003 0.055 Uiso 1 1 calc R . . 
C34 C 0.37573(17) 0.29049(17) 1.05982(14) 0.0403(4) Uani 1 1 d . . . 
C29 C 0.46904(17) 0.40666(16) 1.13077(15) 0.0419(4) Uani 1 1 d . . . 
C9 C 0.83432(18) 0.26791(17) 0.27707(14) 0.0430(5) Uani 1 1 d . . . 
C3 C 1.16208(19) 0.41581(17) -0.17511(15) 0.0482(5) Uani 1 1 d . . . 
H3 H 1.2341 0.4430 -0.2131 0.058 Uiso 1 1 calc R . . 
C1 C 0.9643(2) 0.36041(19) -0.16994(16) 0.0516(5) Uani 1 1 d . . . 
H1 H 0.9060 0.3490 -0.2025 0.062 Uiso 1 1 calc R . . 
C24 C 0.34200(18) 0.41564(17) 1.18038(15) 0.0443(5) Uani 1 1 d . . . 
C35 C 0.46348(18) 0.08651(17) 0.85070(14) 0.0419(4) Uani 1 1 d . . . 
C41 C 0.71448(18) 0.13484(17) 0.87589(16) 0.0462(5) Uani 1 1 d . . . 
C2 C 1.0726(2) 0.39847(19) -0.22289(16) 0.0532(5) Uani 1 1 d . . . 
H2 H 1.0875 0.4133 -0.2928 0.064 Uiso 1 1 calc R . . 
C12 C 0.7496(2) 0.24345(19) 0.37887(15) 0.0523(5) Uani 1 1 d . . . 
C28 C 0.54175(19) 0.47499(18) 1.15938(17) 0.0519(5) Uani 1 1 d . . . 
H28 H 0.6249 0.4730 1.1255 0.062 Uiso 1 1 calc R . . 
C36 C 0.3661(2) 0.1156(2) 0.80610(16) 0.0528(5) Uani 1 1 d . . . 
H36 H 0.3120 0.1842 0.8217 0.063 Uiso 1 1 calc R . . 
C25 C 0.2889(2) 0.48402(19) 1.26391(17) 0.0549(6) Uani 1 1 d . . . 
H25 H 0.2060 0.4865 1.2989 0.066 Uiso 1 1 calc R . . 
C27 C 0.4871(2) 0.5455(2) 1.23915(19) 0.0616(6) Uani 1 1 d . . . 
H27 H 0.5339 0.5929 1.2579 0.074 Uiso 1 1 calc R . . 
C23 C 1.1240(2) 0.2132(2) 0.34822(17) 0.0554(6) Uani 1 1 d . . . 
H23 H 1.1637 0.1692 0.2925 0.067 Uiso 1 1 calc R . . 
C40 C 0.5423(2) -0.01738(17) 0.82584(16) 0.0524(5) Uani 1 1 d . . . 
H40 H 0.6080 -0.0392 0.8551 0.063 Uiso 1 1 calc R . . 
C19 C 0.9557(2) 0.34891(19) 0.43400(16) 0.0537(5) Uani 1 1 d . . . 
H19 H 0.8809 0.3967 0.4368 0.064 Uiso 1 1 calc R . . 
C46 C 0.7872(2) 0.0650(2) 0.9309(2) 0.0645(6) Uani 1 1 d . . . 
H46 H 0.7566 0.0531 1.0008 0.077 Uiso 1 1 calc R . . 
C38 C 0.4274(2) -0.0566(2) 0.71371(19) 0.0671(7) Uani 1 1 d . . . 
H38 H 0.4162 -0.1035 0.6672 0.081 Uiso 1 1 calc R . . 
C20 C 1.0096(3) 0.3428(2) 0.51398(18) 0.0673(7) Uani 1 1 d . . . 
H20 H 0.9714 0.3878 0.5694 0.081 Uiso 1 1 calc R . . 
C39 C 0.5242(2) -0.0880(2) 0.75847(18) 0.0639(6) Uani 1 1 d . . . 
H39 H 0.5774 -0.1571 0.7430 0.077 Uiso 1 1 calc R . . 
C37 C 0.3482(2) 0.0441(2) 0.73869(18) 0.0664(7) Uani 1 1 d . . . 
H37 H 0.2818 0.0647 0.7101 0.080 Uiso 1 1 calc R . . 
C42 C 0.7618(2) 0.1512(2) 0.77176(18) 0.0623(6) Uani 1 1 d . . . 
H42 H 0.7142 0.1976 0.7335 0.075 Uiso 1 1 calc R . . 
C26 C 0.3637(2) 0.5474(2) 1.29230(18) 0.0620(6) Uani 1 1 d . . . 
H26 H 0.3311 0.5925 1.3483 0.074 Uiso 1 1 calc R . . 
C13 C 0.6348(2) 0.3111(3) 0.40755(19) 0.0713(7) Uani 1 1 d . . . 
H13 H 0.6128 0.3726 0.3646 0.086 Uiso 1 1 calc R . . 
C17 C 0.7774(3) 0.1508(2) 0.44322(18) 0.0737(7) Uani 1 1 d . . . 
H17 H 0.8534 0.1033 0.4253 0.088 Uiso 1 1 calc R . . 
C45 C 0.9044(3) 0.0129(3) 0.8833(3) 0.0893(10) Uani 1 1 d . . . 
H45 H 0.9519 -0.0345 0.9210 0.107 Uiso 1 1 calc R . . 
C22 C 1.1760(3) 0.2075(2) 0.4288(2) 0.0739(7) Uani 1 1 d . . . 
H22 H 1.2509 0.1600 0.4266 0.089 Uiso 1 1 calc R . . 
C14 C 0.5526(3) 0.2876(4) 0.4998(3) 0.1054(12) Uani 1 1 d . . . 
H14 H 0.4768 0.3349 0.5194 0.127 Uiso 1 1 calc R . . 
C44 C 0.9510(3) 0.0308(3) 0.7805(3) 0.0970(11) Uani 1 1 d . . . 
H44 H 1.0307 -0.0031 0.7487 0.116 Uiso 1 1 calc R . . 
C43 C 0.8793(3) 0.0991(3) 0.7247(2) 0.0880(9) Uani 1 1 d . . . 
H43 H 0.9102 0.1102 0.6547 0.106 Uiso 1 1 calc R . . 
C21 C 1.1180(3) 0.2715(3) 0.5123(2) 0.0792(8) Uani 1 1 d . . . 
H21 H 1.1524 0.2661 0.5670 0.095 Uiso 1 1 calc R . . 
C15 C 0.5819(4) 0.1960(4) 0.5620(2) 0.1165(15) Uani 1 1 d . . . 
H15 H 0.5259 0.1799 0.6234 0.140 Uiso 1 1 calc R . . 
C16 C 0.6931(5) 0.1284(3) 0.5338(2) 0.1066(13) Uani 1 1 d . . . 
H16 H 0.7130 0.0656 0.5764 0.128 Uiso 1 1 calc R . . 
H6 H 0.201(2) 0.344(2) 1.1520(18) 0.070(7) Uiso 1 1 d . . . 
H5 H 0.769(2) 0.301(2) -0.0029(19) 0.071(7) Uiso 1 1 d . . . 
  
loop_ 
 _atom_site_aniso_label 
 _atom_site_aniso_U_11 
 _atom_site_aniso_U_22 
 _atom_site_aniso_U_33 
 _atom_site_aniso_U_23 
 _atom_site_aniso_U_13 
 _atom_site_aniso_U_12 
N2 0.0326(8) 0.0456(9) 0.0394(9) -0.0060(7) -0.0105(7) -0.0089(6) 
N4 0.0307(8) 0.0524(9) 0.0432(9) -0.0058(7) -0.0106(7) -0.0108(7) 
C7 0.0323(10) 0.0408(10) 0.0386(10) -0.0068(8) -0.0097(8) -0.0069(7) 
C5 0.0323(10) 0.0396(9) 0.0389(10) -0.0059(8) -0.0093(8) -0.0055(7) 
C30 0.0318(10) 0.0489(10) 0.0398(10) -0.0016(8) -0.0112(8) -0.0118(8) 
N3 0.0284(9) 0.0688(11) 0.0502(10) -0.0151(8) -0.0083(7) -0.0112(8) 
N1 0.0367(10) 0.0698(11) 0.0468(10) -0.0034(8) -0.0168(8) -0.0214(8) 
C33 0.0306(10) 0.0551(11) 0.0455(11) -0.0020(9) -0.0133(8) -0.0141(8) 
C32 0.0385(10) 0.0448(10) 0.0404(10) 0.0008(8) -0.0136(8) -0.0108(8) 
C8 0.0379(10) 0.0420(10) 0.0388(10) -0.0049(8) -0.0088(8) -0.0092(8) 
C11 0.0347(10) 0.0479(10) 0.0416(10) -0.0060(8) -0.0105(8) -0.0121(8) 
C4 0.0323(10) 0.0484(10) 0.0449(11) -0.0042(8) -0.0119(8) -0.0082(8) 
C31 0.0356(10) 0.0471(10) 0.0388(10) -0.0027(8) -0.0116(8) -0.0089(8) 
C6 0.0366(10) 0.0473(10) 0.0411(10) -0.0049(8) -0.0112(8) -0.0099(8) 
C18 0.0466(12) 0.0472(10) 0.0386(10) -0.0020(8) -0.0106(8) -0.0135(9) 
C10 0.0327(10) 0.0579(12) 0.0493(11) -0.0027(9) -0.0086(8) -0.0184(9) 
C34 0.0298(10) 0.0526(11) 0.0408(10) -0.0029(8) -0.0107(8) -0.0094(8) 
C29 0.0339(10) 0.0487(11) 0.0460(11) -0.0050(9) -0.0138(8) -0.0073(8) 
C9 0.0404(11) 0.0476(11) 0.0418(11) -0.0032(8) -0.0065(8) -0.0156(8) 
C3 0.0432(12) 0.0538(12) 0.0442(11) -0.0009(9) -0.0041(9) -0.0111(9) 
C1 0.0535(13) 0.0637(13) 0.0459(12) -0.0049(10) -0.0225(10) -0.0146(10) 
C24 0.0338(10) 0.0531(11) 0.0490(11) -0.0067(9) -0.0146(8) -0.0067(8) 
C35 0.0423(11) 0.0486(11) 0.0378(10) 0.0007(8) -0.0100(8) -0.0183(8) 
C41 0.0375(11) 0.0487(11) 0.0551(12) -0.0120(9) -0.0113(9) -0.0102(8) 
C2 0.0616(14) 0.0612(13) 0.0376(11) -0.0002(9) -0.0138(10) -0.0119(11) 
C12 0.0546(14) 0.0638(13) 0.0427(11) -0.0051(10) -0.0061(10) -0.0301(10) 
C28 0.0377(11) 0.0567(12) 0.0658(14) -0.0134(10) -0.0168(10) -0.0085(9) 
C36 0.0460(12) 0.0657(13) 0.0516(12) -0.0054(10) -0.0152(10) -0.0170(10) 
C25 0.0419(12) 0.0663(13) 0.0552(13) -0.0147(11) -0.0101(10) -0.0024(10) 
C27 0.0555(14) 0.0608(13) 0.0773(16) -0.0245(12) -0.0259(12) -0.0072(11) 
C23 0.0551(13) 0.0634(13) 0.0486(12) -0.0110(10) -0.0176(10) 0.0001(10) 
C40 0.0583(14) 0.0478(11) 0.0543(12) -0.0010(10) -0.0168(10) -0.0147(10) 
C19 0.0552(13) 0.0592(13) 0.0476(12) -0.0116(10) -0.0152(10) -0.0038(10) 
C46 0.0538(14) 0.0647(14) 0.0815(17) -0.0177(12) -0.0304(13) 0.0021(11) 
C38 0.0788(18) 0.0761(16) 0.0567(14) -0.0131(12) -0.0133(13) -0.0414(14) 
C20 0.0799(18) 0.0810(16) 0.0455(13) -0.0198(12) -0.0187(12) -0.0117(14) 
C39 0.0782(17) 0.0522(13) 0.0623(14) -0.0103(11) -0.0091(13) -0.0237(12) 
C37 0.0648(16) 0.0863(18) 0.0618(15) -0.0074(13) -0.0271(12) -0.0295(14) 
C42 0.0566(14) 0.0673(14) 0.0566(14) -0.0118(11) 0.0007(11) -0.0130(11) 
C26 0.0623(15) 0.0623(14) 0.0632(14) -0.0231(11) -0.0194(12) 0.0016(11) 
C13 0.0513(15) 0.0971(19) 0.0610(15) -0.0162(13) 0.0057(11) -0.0261(13) 
C17 0.104(2) 0.0704(16) 0.0521(14) 0.0030(12) -0.0176(14) -0.0369(15) 
C45 0.0568(17) 0.0820(19) 0.136(3) -0.0407(19) -0.0387(19) 0.0133(14) 
C22 0.0745(18) 0.0859(18) 0.0660(16) -0.0118(13) -0.0375(14) 0.0108(14) 
C14 0.074(2) 0.158(3) 0.074(2) -0.035(2) 0.0208(17) -0.039(2) 
C44 0.0451(16) 0.097(2) 0.145(3) -0.063(2) -0.0070(19) 0.0022(15) 
C43 0.0690(19) 0.094(2) 0.086(2) -0.0350(17) 0.0201(16) -0.0215(16) 
C21 0.092(2) 0.099(2) 0.0547(15) -0.0132(14) -0.0385(14) 0.0017(16) 
C15 0.139(4) 0.164(4) 0.0523(18) -0.015(2) 0.017(2) -0.103(3) 
C16 0.174(4) 0.105(2) 0.0484(17) 0.0068(16) -0.009(2) -0.080(3) 
  
_geom_special_details 
; 
 All esds (except the esd in the dihedral angle between two l.s. planes) 
 are estimated using the full covariance matrix.  The cell esds are taken 
 into account individually in the estimation of esds in distances, angles 
 and torsion angles; correlations between esds in cell parameters are only 
 used when they are defined by crystal symmetry.  An approximate (isotropic) 
 treatment of cell esds is used for estimating esds involving l.s. planes. 
; 
  
loop_ 
 _geom_bond_atom_site_label_1 
 _geom_bond_atom_site_label_2 
 _geom_bond_distance 
 _geom_bond_site_symmetry_2 
 _geom_bond_publ_flag 
N2 C7 1.343(2) . ? 
N2 C8 1.350(2) . ? 
N4 C30 1.345(2) . ? 
N4 C31 1.348(2) . ? 
C7 C11 1.406(3) . ? 
C7 C5 1.447(3) . ? 
C5 C4 1.397(3) . ? 
C5 C6 1.408(3) . ? 
C30 C34 1.404(3) . ? 
C30 C29 1.449(3) . ? 
N3 C34 1.373(2) . ? 
N3 C24 1.384(3) . ? 
N3 H6 0.94(3) . ? 
N1 C11 1.370(2) . ? 
N1 C6 1.378(3) . ? 
N1 H5 0.88(3) . ? 
C33 C34 1.382(3) . ? 
C33 C32 1.394(3) . ? 
C33 H33 0.9300 . ? 
C32 C31 1.421(3) . ? 
C32 C35 1.493(3) . ? 
C8 C9 1.408(3) . ? 
C8 C18 1.497(3) . ? 
C11 C10 1.382(3) . ? 
C4 C3 1.376(3) . ? 
C4 H4 0.9300 . ? 
C31 C41 1.494(3) . ? 
C6 C1 1.392(3) . ? 
C18 C23 1.383(3) . ? 
C18 C19 1.388(3) . ? 
C10 C9 1.389(3) . ? 
C10 H10 0.9300 . ? 
C29 C28 1.397(3) . ? 
C29 C24 1.409(3) . ? 
C9 C12 1.494(3) . ? 
C3 C2 1.405(3) . ? 
C3 H3 0.9300 . ? 
C1 C2 1.369(3) . ? 
C1 H1 0.9300 . ? 
C24 C25 1.399(3) . ? 
C35 C36 1.386(3) . ? 
C35 C40 1.396(3) . ? 
C41 C46 1.384(3) . ? 
C41 C42 1.386(3) . ? 
C2 H2 0.9300 . ? 
C12 C17 1.380(3) . ? 
C12 C13 1.385(3) . ? 
C28 C27 1.378(3) . ? 
C28 H28 0.9300 . ? 
C36 C37 1.385(3) . ? 
C36 H36 0.9300 . ? 
C25 C26 1.373(3) . ? 
C25 H25 0.9300 . ? 
C27 C26 1.390(3) . ? 
C27 H27 0.9300 . ? 
C23 C22 1.381(3) . ? 
C23 H23 0.9300 . ? 
C40 C39 1.378(3) . ? 
C40 H40 0.9300 . ? 
C19 C20 1.387(3) . ? 
C19 H19 0.9300 . ? 
C46 C45 1.379(4) . ? 
C46 H46 0.9300 . ? 
C38 C37 1.369(4) . ? 
C38 C39 1.385(4) . ? 
C38 H38 0.9300 . ? 
C20 C21 1.363(4) . ? 
C20 H20 0.9300 . ? 
C39 H39 0.9300 . ? 
C37 H37 0.9300 . ? 
C42 C43 1.379(4) . ? 
C42 H42 0.9300 . ? 
C26 H26 0.9300 . ? 
C13 C14 1.385(4) . ? 
C13 H13 0.9300 . ? 
C17 C16 1.376(4) . ? 
C17 H17 0.9300 . ? 
C45 C44 1.370(5) . ? 
C45 H45 0.9300 . ? 
C22 C21 1.378(4) . ? 
C22 H22 0.9300 . ? 
C14 C15 1.357(6) . ? 
C14 H14 0.9300 . ? 
C44 C43 1.377(5) . ? 
C44 H44 0.9300 . ? 
C43 H43 0.9300 . ? 
C21 H21 0.9300 . ? 
C15 C16 1.354(5) . ? 
C15 H15 0.9300 . ? 
C16 H16 0.9300 . ? 
  
loop_ 
 _geom_angle_atom_site_label_1 
 _geom_angle_atom_site_label_2 
 _geom_angle_atom_site_label_3 
 _geom_angle 
 _geom_angle_site_symmetry_1 
 _geom_angle_site_symmetry_3 
 _geom_angle_publ_flag 
C7 N2 C8 117.29(15) . . ? 
C30 N4 C31 117.53(15) . . ? 
N2 C7 C11 122.70(16) . . ? 
N2 C7 C5 130.96(16) . . ? 
C11 C7 C5 106.33(16) . . ? 
C4 C5 C6 118.89(17) . . ? 
C4 C5 C7 135.03(17) . . ? 
C6 C5 C7 105.92(16) . . ? 
N4 C30 C34 122.63(17) . . ? 
N4 C30 C29 130.13(16) . . ? 
C34 C30 C29 107.07(16) . . ? 
C34 N3 C24 108.12(16) . . ? 
C34 N3 H6 126.1(15) . . ? 
C24 N3 H6 125.5(15) . . ? 
C11 N1 C6 108.38(16) . . ? 
C11 N1 H5 121.5(16) . . ? 
C6 N1 H5 129.9(16) . . ? 
C34 C33 C32 118.61(17) . . ? 
C34 C33 H33 120.7 . . ? 
C32 C33 H33 120.7 . . ? 
C33 C32 C31 118.09(17) . . ? 
C33 C32 C35 116.94(17) . . ? 
C31 C32 C35 124.96(17) . . ? 
N2 C8 C9 122.76(17) . . ? 
N2 C8 C18 115.10(16) . . ? 
C9 C8 C18 122.14(17) . . ? 
N1 C11 C10 130.25(18) . . ? 
N1 C11 C7 109.69(16) . . ? 
C10 C11 C7 120.03(17) . . ? 
C3 C4 C5 119.50(18) . . ? 
C3 C4 H4 120.3 . . ? 
C5 C4 H4 120.3 . . ? 
N4 C31 C32 123.04(17) . . ? 
N4 C31 C41 112.81(16) . . ? 
C32 C31 C41 124.05(17) . . ? 
N1 C6 C1 128.38(18) . . ? 
N1 C6 C5 109.64(16) . . ? 
C1 C6 C5 121.97(18) . . ? 
C23 C18 C19 118.58(19) . . ? 
C23 C18 C8 120.21(17) . . ? 
C19 C18 C8 121.21(18) . . ? 
C11 C10 C9 117.55(17) . . ? 
C11 C10 H10 121.2 . . ? 
C9 C10 H10 121.2 . . ? 
N3 C34 C33 130.87(17) . . ? 
N3 C34 C30 109.45(16) . . ? 
C33 C34 C30 119.68(17) . . ? 
C28 C29 C24 119.55(18) . . ? 
C28 C29 C30 135.21(18) . . ? 
C24 C29 C30 105.23(16) . . ? 
C10 C9 C8 119.55(17) . . ? 
C10 C9 C12 116.99(17) . . ? 
C8 C9 C12 123.46(18) . . ? 
C4 C3 C2 120.00(19) . . ? 
C4 C3 H3 120.0 . . ? 
C2 C3 H3 120.0 . . ? 
C2 C1 C6 117.30(19) . . ? 
C2 C1 H1 121.3 . . ? 
C6 C1 H1 121.3 . . ? 
N3 C24 C25 128.59(19) . . ? 
N3 C24 C29 110.04(17) . . ? 
C25 C24 C29 121.34(19) . . ? 
C36 C35 C40 117.84(19) . . ? 
C36 C35 C32 118.93(18) . . ? 
C40 C35 C32 123.19(18) . . ? 
C46 C41 C42 118.6(2) . . ? 
C46 C41 C31 118.54(19) . . ? 
C42 C41 C31 122.79(19) . . ? 
C1 C2 C3 122.17(19) . . ? 
C1 C2 H2 118.9 . . ? 
C3 C2 H2 118.9 . . ? 
C17 C12 C13 118.1(2) . . ? 
C17 C12 C9 122.6(2) . . ? 
C13 C12 C9 119.1(2) . . ? 
C27 C28 C29 118.3(2) . . ? 
C27 C28 H28 120.9 . . ? 
C29 C28 H28 120.9 . . ? 
C37 C36 C35 121.0(2) . . ? 
C37 C36 H36 119.5 . . ? 
C35 C36 H36 119.5 . . ? 
C26 C25 C24 117.6(2) . . ? 
C26 C25 H25 121.2 . . ? 
C24 C25 H25 121.2 . . ? 
C28 C27 C26 121.6(2) . . ? 
C28 C27 H27 119.2 . . ? 
C26 C27 H27 119.2 . . ? 
C22 C23 C18 120.5(2) . . ? 
C22 C23 H23 119.8 . . ? 
C18 C23 H23 119.8 . . ? 
C39 C40 C35 120.9(2) . . ? 
C39 C40 H40 119.6 . . ? 
C35 C40 H40 119.6 . . ? 
C20 C19 C18 120.2(2) . . ? 
C20 C19 H19 119.9 . . ? 
C18 C19 H19 119.9 . . ? 
C45 C46 C41 120.8(3) . . ? 
C45 C46 H46 119.6 . . ? 
C41 C46 H46 119.6 . . ? 
C37 C38 C39 119.3(2) . . ? 
C37 C38 H38 120.4 . . ? 
C39 C38 H38 120.4 . . ? 
C21 C20 C19 120.7(2) . . ? 
C21 C20 H20 119.6 . . ? 
C19 C20 H20 119.6 . . ? 
C40 C39 C38 120.4(2) . . ? 
C40 C39 H39 119.8 . . ? 
C38 C39 H39 119.8 . . ? 
C38 C37 C36 120.6(2) . . ? 
C38 C37 H37 119.7 . . ? 
C36 C37 H37 119.7 . . ? 
C43 C42 C41 120.3(3) . . ? 
C43 C42 H42 119.8 . . ? 
C41 C42 H42 119.8 . . ? 
C25 C26 C27 121.4(2) . . ? 
C25 C26 H26 119.3 . . ? 
C27 C26 H26 119.3 . . ? 
C14 C13 C12 120.3(3) . . ? 
C14 C13 H13 119.8 . . ? 
C12 C13 H13 119.8 . . ? 
C16 C17 C12 120.3(3) . . ? 
C16 C17 H17 119.9 . . ? 
C12 C17 H17 119.9 . . ? 
C44 C45 C46 120.2(3) . . ? 
C44 C45 H45 119.9 . . ? 
C46 C45 H45 119.9 . . ? 
C21 C22 C23 120.5(2) . . ? 
C21 C22 H22 119.7 . . ? 
C23 C22 H22 119.7 . . ? 
C15 C14 C13 120.5(4) . . ? 
C15 C14 H14 119.7 . . ? 
C13 C14 H14 119.7 . . ? 
C45 C44 C43 119.6(3) . . ? 
C45 C44 H44 120.2 . . ? 
C43 C44 H44 120.2 . . ? 
C44 C43 C42 120.4(3) . . ? 
C44 C43 H43 119.8 . . ? 
C42 C43 H43 119.8 . . ? 
C20 C21 C22 119.4(2) . . ? 
C20 C21 H21 120.3 . . ? 
C22 C21 H21 120.3 . . ? 
C16 C15 C14 119.5(3) . . ? 
C16 C15 H15 120.3 . . ? 
C14 C15 H15 120.3 . . ? 
C15 C16 C17 121.2(4) . . ? 
C15 C16 H16 119.4 . . ? 
C17 C16 H16 119.4 . . ? 
  
_diffrn_measured_fraction_theta_max    0.994 
_diffrn_reflns_theta_full              25.20 
_diffrn_measured_fraction_theta_full   0.994 
_refine_diff_density_max    0.188 
_refine_diff_density_min   -0.195 
_refine_diff_density_rms    0.056 
